# Supplementary material for: Ecological Specialization of Two Photobiont-Specific Maritime Cyanolichen Species of the Genus Lichina
Source: PubMed Central journal article supplement (PMC4504470; doi:10.1371/journal.pone.0132718), 2015-07-16

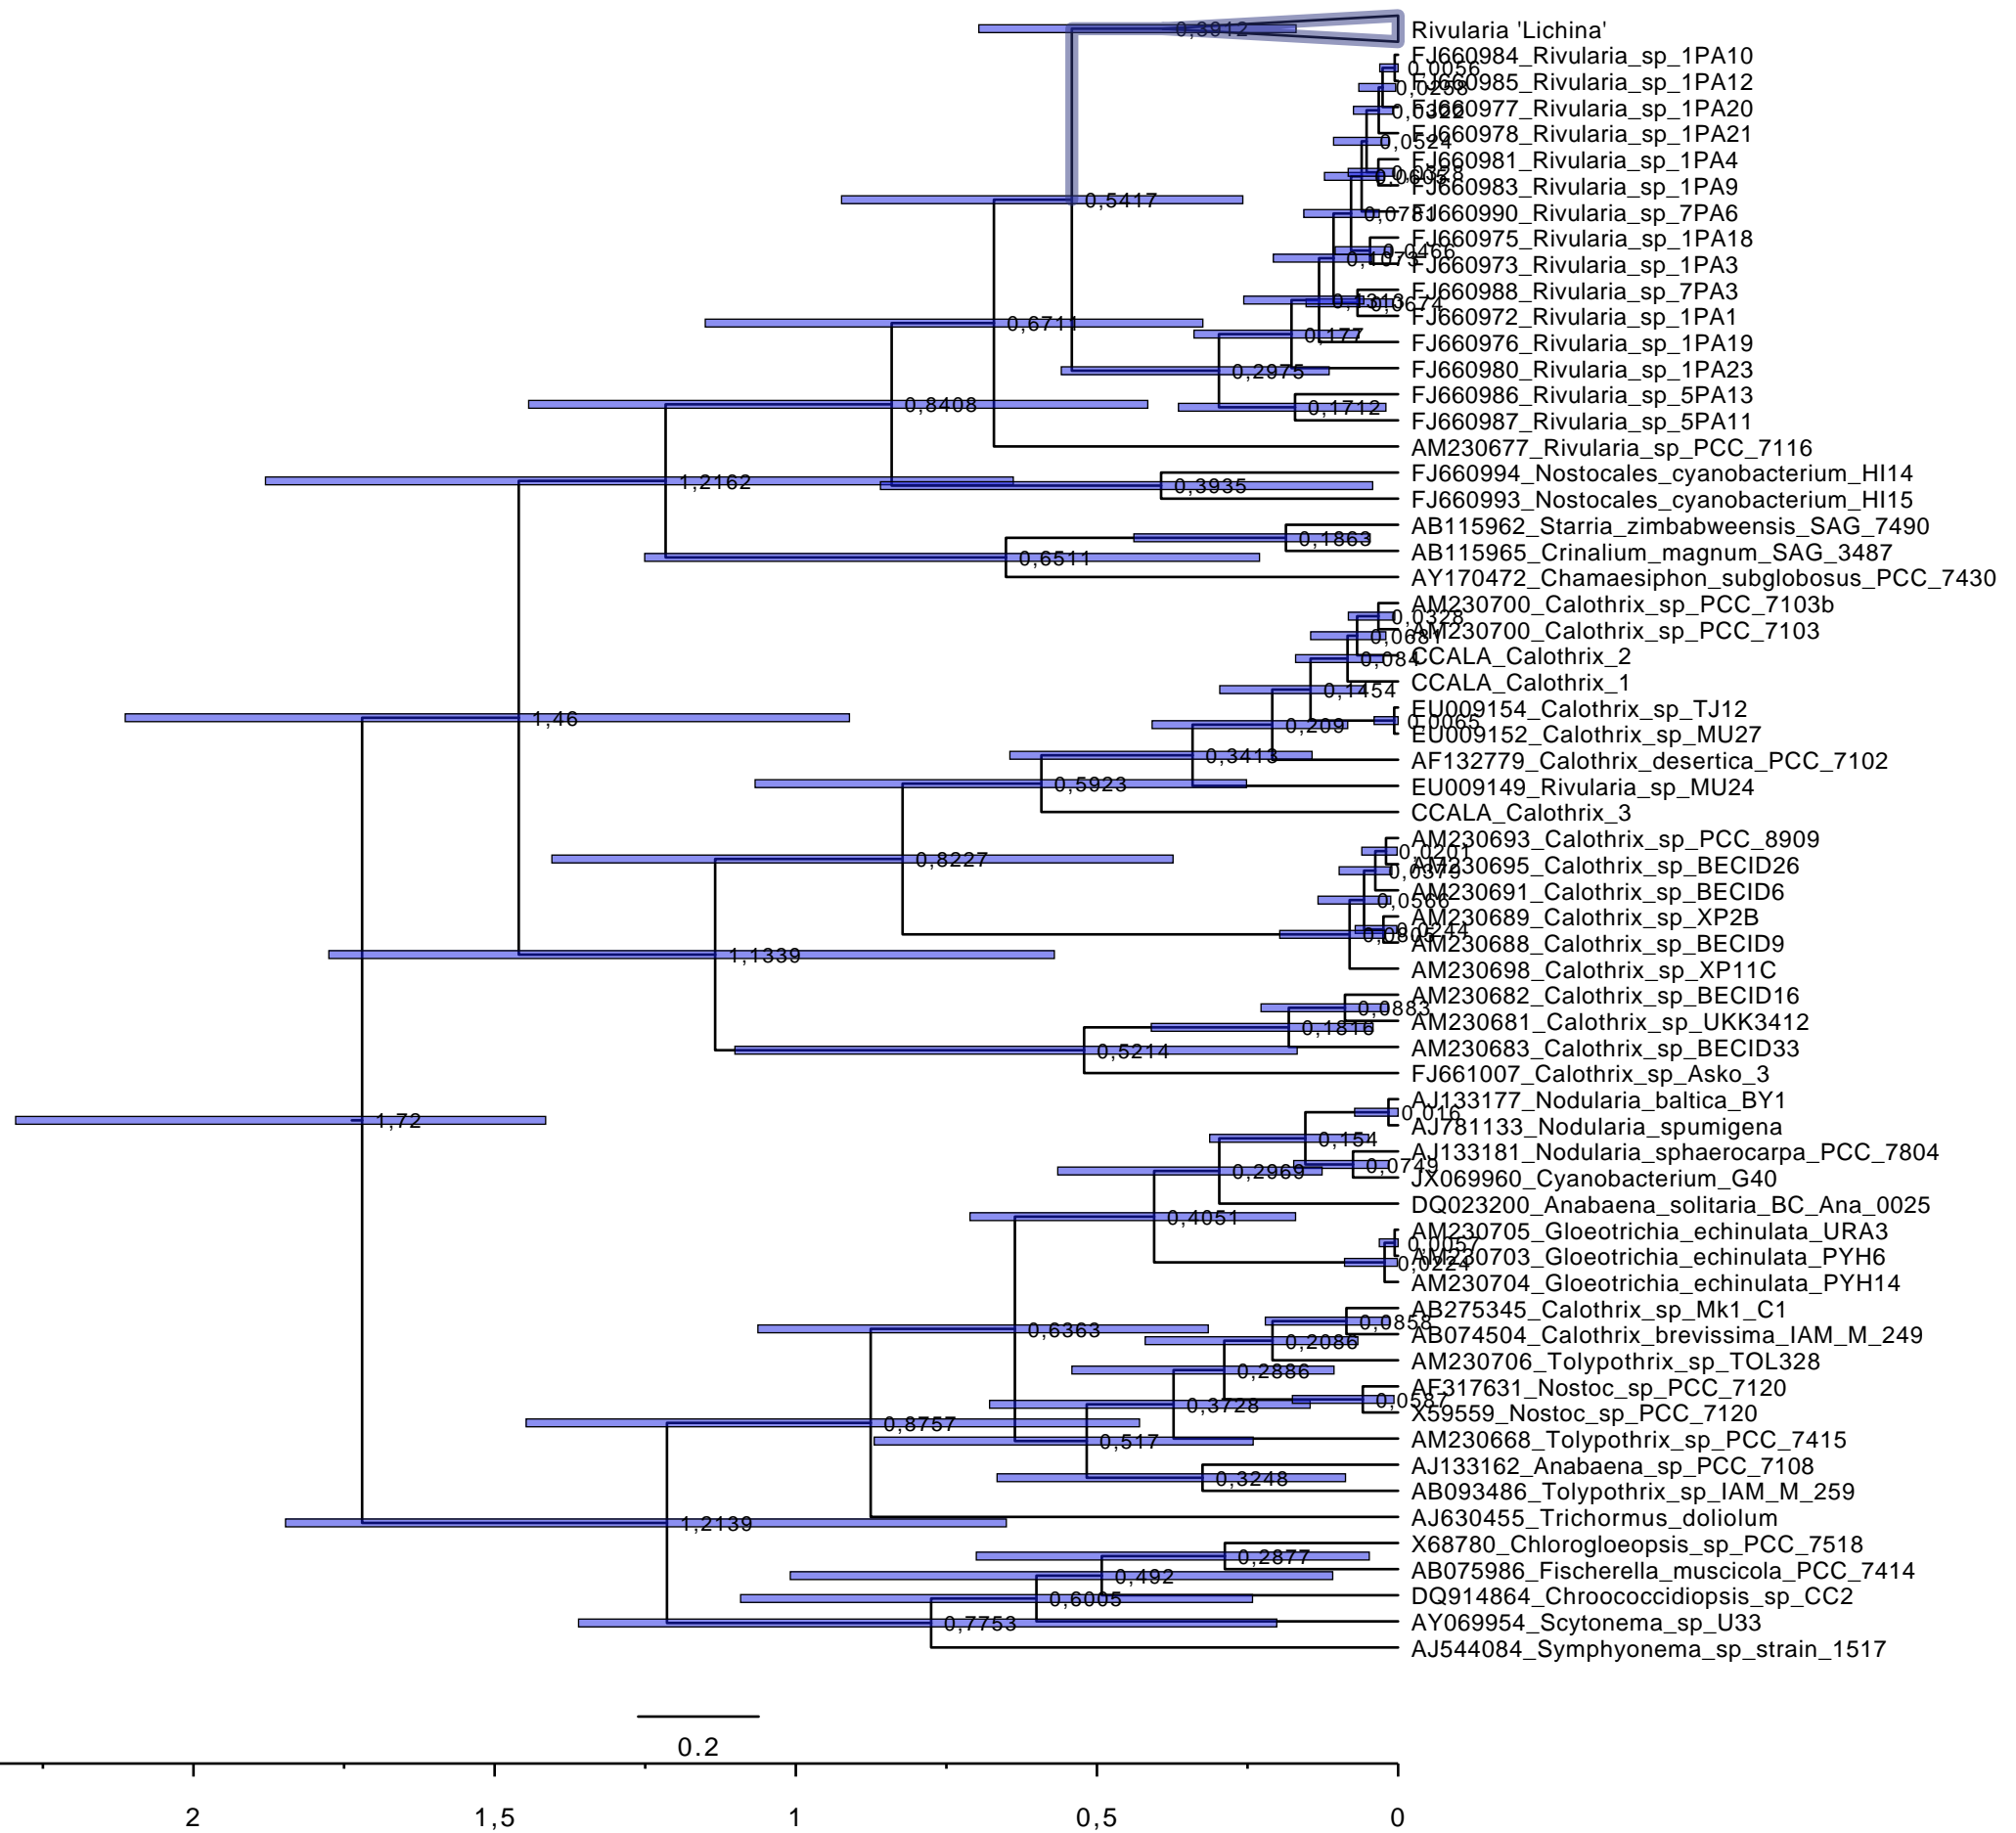

Supplement: pone.0132718.s001.pdf [file pone.0132718.s001.pdf]
